# Supplementary material for: Single oxygen vacancies of (TiO2)35as a prototype reduced nanoparticle: implication for photocatalytic activity
Source: Royal Society of Chemistry journal article supplement (doi:10.1039/c6cp04515d), 2016-01-01
Supplement: c6cp04515d1.pdf [file c6cp04515d1.pdf]

## Single oxygen vacancies of $(\text{TiO}_2)_{35}$ as a prototype of reduced nanoparticle: Implication to photocatalytic activity

Sunkyung Kim,<sup>1</sup> Kyoung Chul Ko,<sup>1,2</sup> Jin Yong Lee,<sup>\*,1</sup> and Francesc Illas<sup>\*,2</sup>

<sup>1</sup>Department of Chemistry, Sungkyunkwan University, Suwon 16419, Korea

<sup>2</sup>Departament de Química Física & Institut de Química Teòrica i Computacional (IQTCUB),  
Universitat de Barcelona, 08028 Barcelona, Spain

### Corresponding Authors

\*jinylee@skku.edu (Phone: +82-31-299-4560, Fax: +82-31-290-7075), francesc.illas@ub.edu

(Phone: +34-93-402-1229. Fax: +34-93-402-1231)

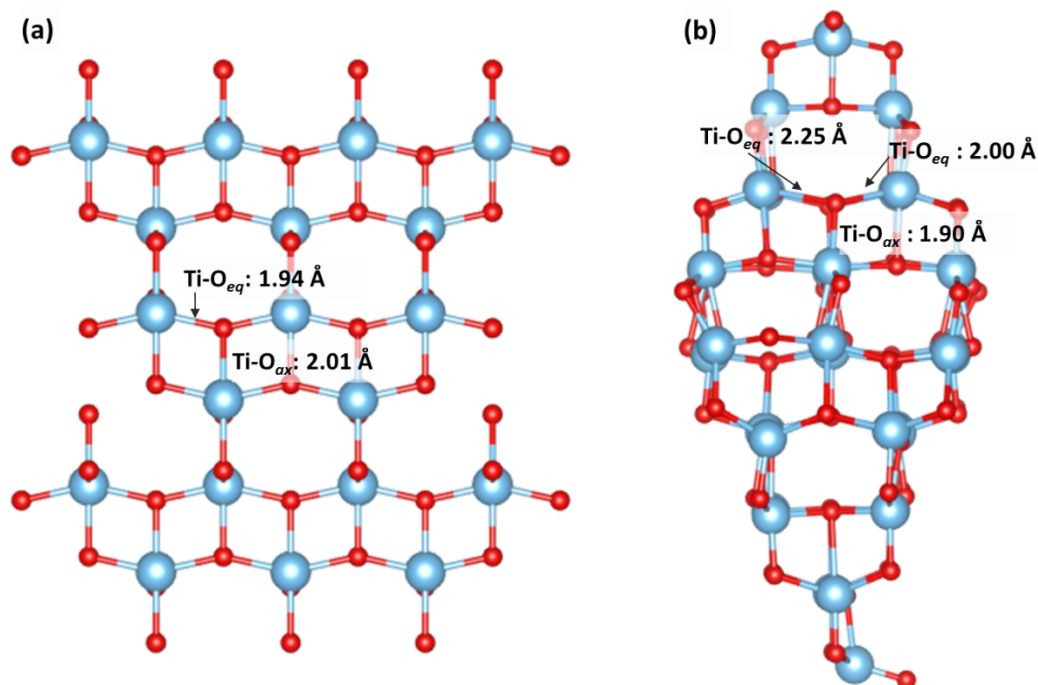

**Fig. S1** Structures of TiO<sub>2</sub> anatase bulk and NP are presented. Ti-O lengths in bulk are from the previous paper.<sup>7, 27</sup>

**Table S1** Calculated band gap energy ( $E_g$ ),  $O_{vac}$  defect state from conduction band minimum (CBM) and oxygen vacancy formation energy ( $E_f^O$ ) in bulk anatase  $TiO_2$  (in eV) are given. Results are summarized according to the ratio of HF exchange from the previous studies.

| Functional (%Fock)        | $E_g$ | $O_{vac}$ defect state<br>from CBM | $E_f^O$     |
|---------------------------|-------|------------------------------------|-------------|
| PBE (0) <sup>34</sup>     | 2.14  | 0.10                               | 3.68        |
| PBEx (12.5) <sup>34</sup> | 3.22  | 0.41 ~ 0.64                        | 4.21 ~ 4.65 |
| B3LYP (20) <sup>28</sup>  | 3.92  | 0.59                               | 4.78        |
| HSE (20) <sup>66</sup>    | 3.37  | 0.54                               | 4.78        |
| HSE06 (25) <sup>39</sup>  | 3.6   | 1.3                                | 4.81*       |

\* Calculated under extreme O-rich conditions.

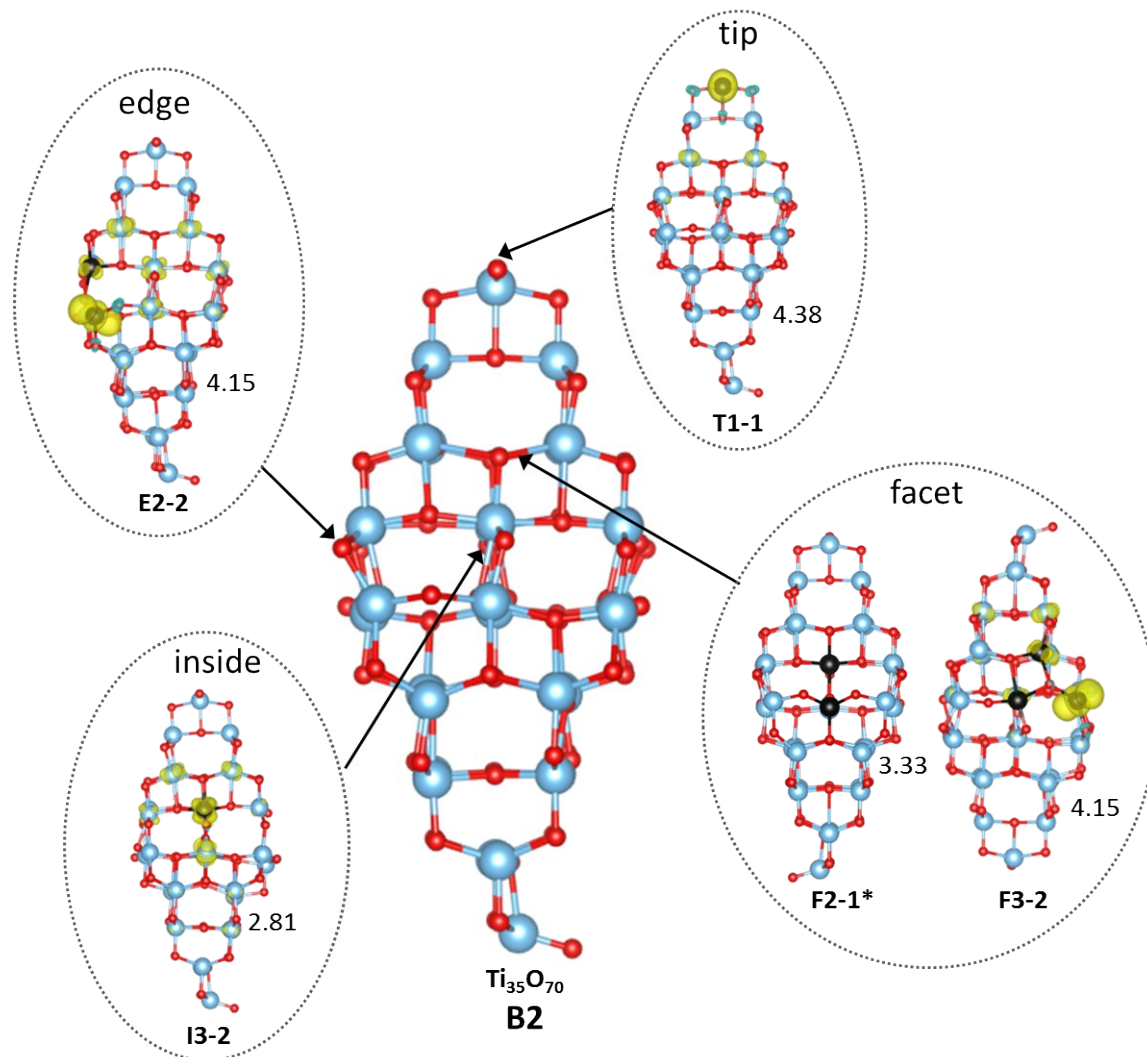

\*At F2-1 site, closed-shell singlet state was more stable than open-shell triplet one.

**Fig. S2** Calculated structure of B2 and five representative structures for single oxygen vacant  $\text{Ti}_{35}\text{O}_{69}$  NP (D) at various  $\text{O}_v$  sites. Yellow color shows the spin density in isosurface of  $0.025 \text{ e}\cdot\text{au}^{-3}$ . Blue, red, and black spheres denote titanium, oxygen and first neighbored titanium atoms to the  $\text{O}_v$  site, respectively.  $E_f^{\text{O}}$  is in eV. All structures and values are calculated in PBE functional.

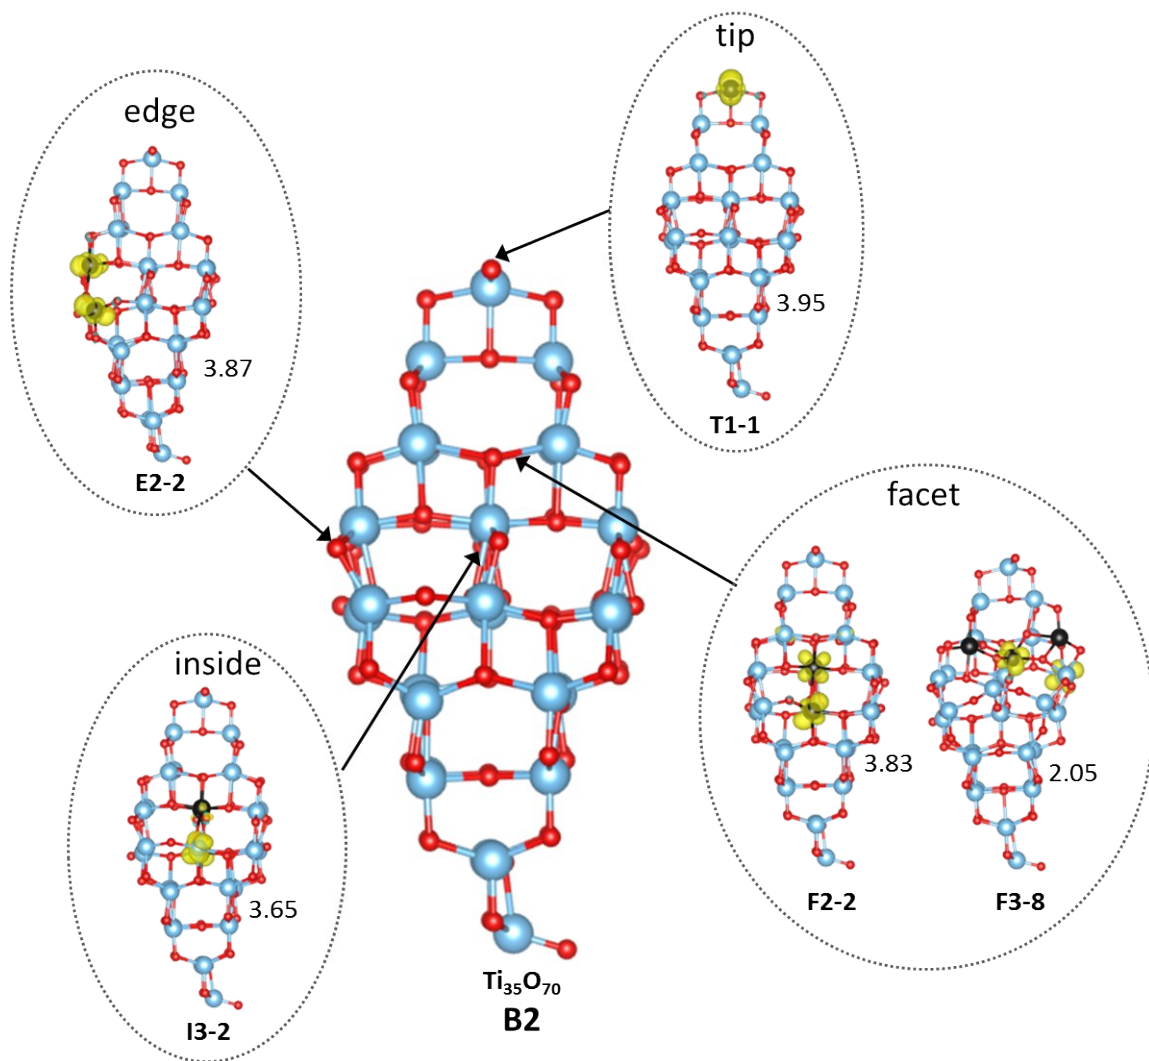

**Fig. S3** Calculated structure of B2 and five representative structures for single oxygen vacant  $\text{Ti}_{35}\text{O}_{69}$  NP (D) at various  $\text{O}_v$  sites. Yellow color shows the spin density in isosurface of 0.05  $\text{e}\cdot\text{au}^{-3}$ .  $E_f^{\text{O}}$  is in eV. All structures and values are calculated in PBE0 functional.

**Table S2** The values (in eV) of vertical energy ( $E_v$ ), relaxation energy ( $E_{rel}$ ), oxygen vacancy formation energy ( $E_f^O$ ), and energy level of oxygen vacancy defect state below LUMO ( $S_{v-1}$  and  $S_{v-2}$ ) calculated using PBE and PBE0 functionals are given. All values are lined up in order of vacant oxygen atom distance from center of mass within each classification to compare functional effect at the same site. In each classification, the lowest  $E_f^O$  value words in bold type.

| position      | CN <sup>a</sup> | site <sup>b</sup> | PBE   |           |             |           |           | PBE0  |             |             |           |           |
|---------------|-----------------|-------------------|-------|-----------|-------------|-----------|-----------|-------|-------------|-------------|-----------|-----------|
|               |                 |                   | $E_v$ | $E_{rel}$ | $E_f^O$     | $S_{v-1}$ | $S_{v-2}$ | $E_v$ | $E_{rel}$   | $E_f^O$     | $S_{v-1}$ | $S_{v-2}$ |
| <b>tip</b>    | 1               | T1-1              | 4.74  | 0.36      | <b>4.38</b> | 0.01      | 0.62      | 4.23  | 0.29        | <b>3.95</b> | 1.60      | 2.08      |
| <b>edge</b>   | 2               | E2-1              | 5.89  | 1.53      | 4.36        | 0.09      | 0.51      | 5.72  | 1.52        | 4.20        | 2.40      | 3.08      |
|               |                 | E2-2              | 5.92  | 1.78      | <b>4.15</b> | 0.07      | 0.61      | 5.87  | 1.99        | <b>3.87</b> | 2.54      | 3.16      |
|               |                 | E2-3              | 5.97  | 1.71      | 4.26        | 0.08      | 0.56      | 5.81  | 1.31        | 4.50        | 2.26      | 3.21      |
|               |                 | E2-4              | 5.71  | 1.49      | 4.22        | 0.12      | 0.19      | 5.73  | 1.62        | 4.10        | 2.47      | 2.77      |
|               |                 | E2-5              | 5.96  | 1.52      | 4.45        |           | 0.34      | 6.23  | 1.68        | 4.56        | 2.20      | 3.01      |
|               |                 | E2-6              | 5.94  | 1.36      | 4.58        | 0.09      | 0.64      | 5.67  | 1.63        | 4.04        | 2.40      | 2.88      |
|               |                 | E2-7              | 5.88  | 1.44      | 4.44        |           | 0.13      | 5.90  | 0.94        | 4.96        | 1.42      | 2.95      |
| <b>facet</b>  | 2               | F2-1              | 5.40  | 2.07      | <b>3.33</b> |           | 0.08      | 5.30  | 1.36        | 3.93        | 1.92      | 2.62      |
|               |                 | F2-2              | 5.21  | 1.84      | 3.37        |           | 0.08      | 5.11  | 1.28        | <b>3.83</b> | 1.91      | 2.66      |
|               |                 | F2-3              | 5.87  | 1.52      | 4.34        | 0.10      | 0.51      | 5.99  | 1.79        | 4.20        | 2.44      | 3.11      |
|               | 3               | F3-1              | 5.80  | 1.54      | 4.26        | 0.08      | 0.56      | 5.94  | 1.75        | 4.19        | 2.25      | 3.32      |
|               |                 | F3-2              | 6.07  | 1.93      | <b>4.15</b> | 0.07      | 0.61      | 6.07  | 1.86        | 4.21        | 2.39      | 3.12      |
|               |                 | F3-3              | 5.89  | 1.56      | 4.33        | 0.13      | 0.50      | 6.06  | 1.71        | 4.35        | 2.36      | 3.06      |
|               |                 | F3-4              | 6.07  | 1.86      | 4.22        | 0.12      | 0.19      | 6.26  | 2.33        | 3.93        | 2.48      | 2.95      |
|               |                 | F3-5              | 5.93  | 1.42      | 4.51        |           | 0.07      | 7.08  | 2.50        | 4.57        | 2.56      | 2.65      |
|               |                 | F3-6              | 6.18  | 1.66      | 4.52        | 0.07      | 0.35      | 6.47  | 2.25        | 4.22        | 2.44      | 3.13      |
|               |                 | F3-7              | 5.79  | 0.67      | 5.12        |           | 0.13      | 6.78  | 1.93        | 4.85        | 2.68      | 2.85      |
| 3             | F3-8            | 6.35              | 1.63  | 4.72      | 0.12        | 0.17      | 6.63      | 4.58  | <b>2.05</b> | 2.48        | 2.58      |           |
|               | F3-9            | 5.06              | 0.67  | 4.39      |             | 0.83      | 6.33      | 1.98  | 4.35        | 2.80        | 3.24      |           |
|               | F3-10           | 5.54              | 0.82  | 4.73      |             | 0.73      | 5.72      | 0.87  | 4.85        |             | 2.66      |           |
| <b>inside</b> | 3               | I3-1              | 5.95  | 1.83      | 4.13        | 0.07      | 0.48      | 5.57  | 1.14        | 4.42        |           | 2.55      |
|               |                 | I3-2              | 5.59  | 2.77      | <b>2.81</b> | 0.04      | 0.11      | 5.92  | 2.27        | <b>3.65</b> | 2.35      | 2.56      |
|               |                 | I3-3              | 5.90  | 3.05      | 2.85        | 0.03      | 0.11      | 6.18  | 2.40        | 3.79        | 1.94      | 2.83      |
|               |                 | I3-4              | 5.88  | 1.75      | 4.13        | 0.09      | 0.75      | 5.55  | 1.17        | 4.38        |           | 2.47      |

<sup>a</sup> CN is number of first neighboring titanium atoms to removed oxygen atom.

<sup>b</sup> site is designated as combination of position, CN, and the order of vacant oxygen atom distant from center of mass.

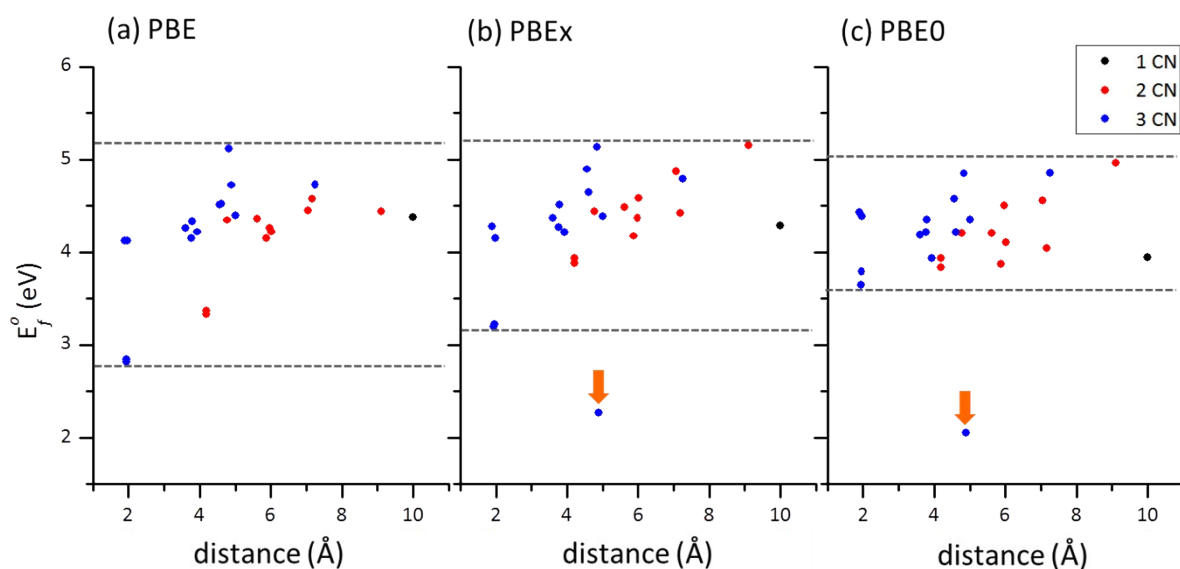

**Fig. S4**  $E_f^O$  against vacant oxygen atom distance from center of mass is calculated using (a) PBE, (b) PBEex, and (c) PBE0. Dotted lines are marked at highest and lowest  $E_f^O$  in each graph, except particularly low points (F3-8 site) indicated by orange arrow.

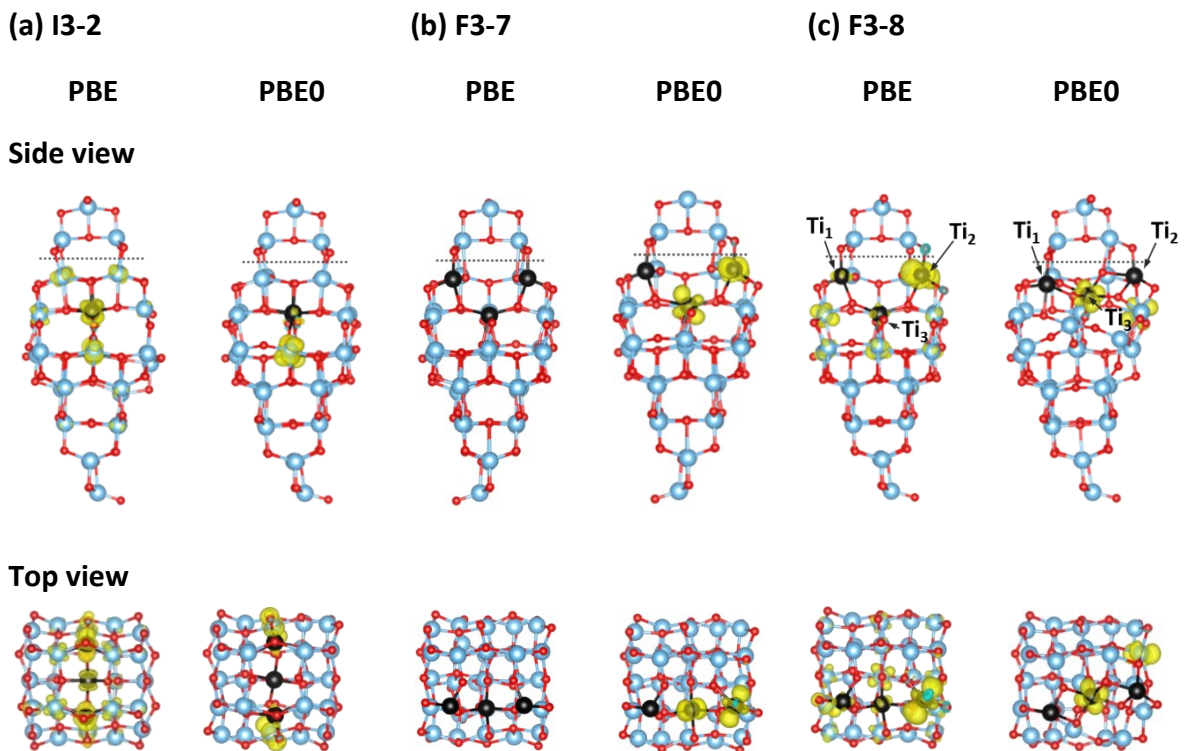

\*At F3-7 site in PBE result, closed-shell singlet state was more stable than open-shell triplet one.

**Fig. S5** Calculated structures of  $\text{Ti}_{35}\text{O}_{69}$  NP that oxygen removed at three  $\text{O}_{3c}$  sites that  $\text{Ti-O}_{ax}$  is shorter than two  $\text{Ti-O}_{eq}$  are presented depending on functionals. Isosurface of spin density are 0.025 in PBE and 0.05  $\text{e}\cdot\text{au}^{-3}$  in PBE0. For clarity, atoms above the dotted line were removed in top view structures.

**Table S3** Interatomic distances (in Å) in optimized pristine TiO<sub>2</sub> NP are listed according to type of O<sub>3c</sub> site that Ti-O<sub>ax</sub> is shorter than two TiO<sub>eq</sub> and DFT functional.

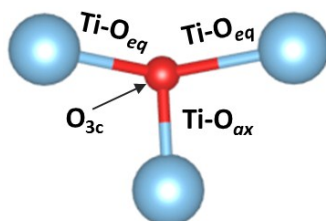

| site        | functional | Ti-O <sub>ax</sub> | Ti-O <sub>eq</sub> | Ti-O <sub>eq</sub> |
|-------------|------------|--------------------|--------------------|--------------------|
| <b>I3-2</b> | PBE        | 1.955              | 2.036              | 2.043              |
|             | PBEx       | 1.941              | 2.020              | 2.027              |
|             | PBE0       | 1.930              | 2.005              | 2.013              |
| <b>F3-7</b> | PBE        | 1.945              | 1.986              | 2.143              |
|             | PBEx       | 1.935              | 1.976              | 2.122              |
|             | PBE0       | 1.927              | 1.971              | 2.100              |
| <b>F3-8</b> | PBE        | 1.906              | 2.009              | 2.276              |
|             | PBEx       | 1.896              | 1.999              | 2.251              |
|             | PBE0       | 1.894              | 1.994              | 2.206              |



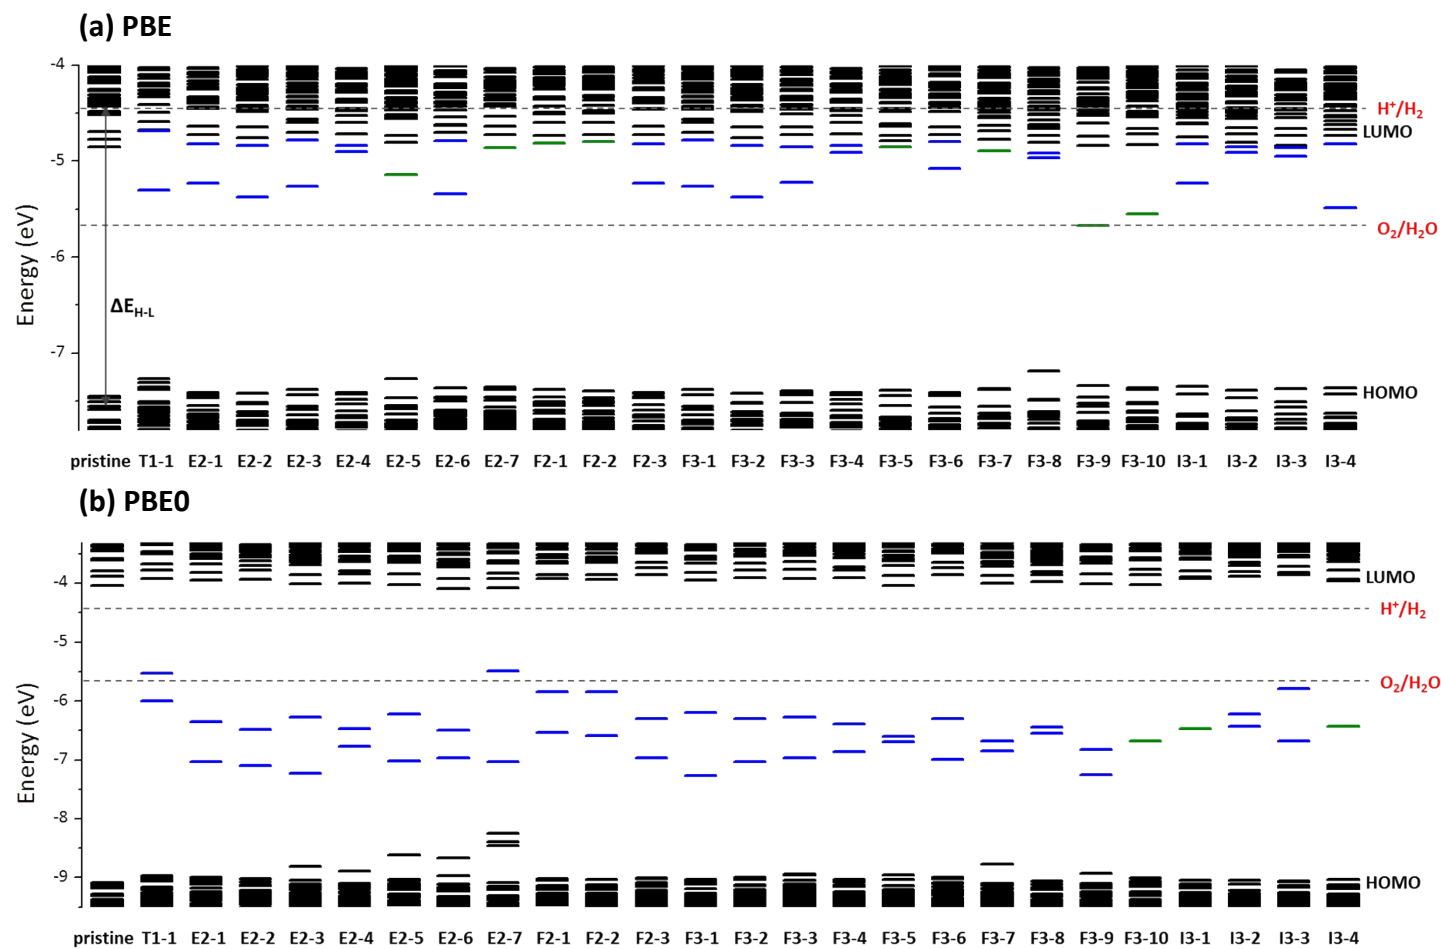

**Fig. S6** Molecular orbitals energy level diagrams of  $Ti_{35}O_{69}$  NP are given depending on functionals. The triplet state energy level is up spin eigenvalues. The dotted lines indicate the standard redox potentials for water splitting at pH = 0. The singly and doubly occupied defect states are denoted in blue and green, respectively. Other occupied and unoccupied molecular orbitals are shown in black.
